# Supplementary material for: An Enzyme-Induced Novel Biosensor for the Sensitive Electrochemical Determination of Isoniazid
Source: Biosensors (Basel). 2017 Jun 5;7(2):21. doi: 10.3390/bios7020021 (PMC5487961; doi:10.3390/bios7020021)
Supplement: Supplementary file 1 [file biosensors-07-00021-s001.pdf]

# Supplementary Materials: An Enzyme-Induced Novel Biosensor for the Sensitive Electrochemical Determination of Isoniazid

Rajasekhar Chokkareddy, Natesh Kumar Bhajanthri, Gan G. Redhi

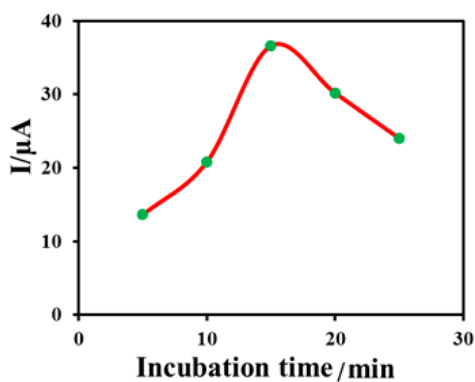

**Figure S1.** The effect of the enzyme incubation time on the current responses of the modified electrode.

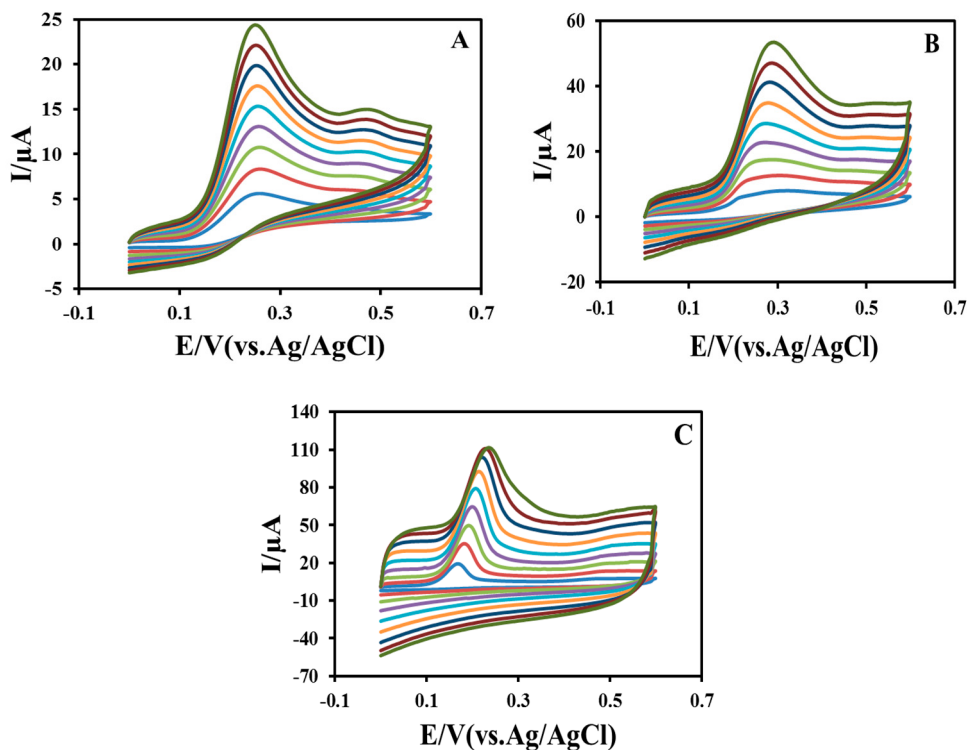

**Figure S2.** Cyclic Voltammograms of INZ with (A) Bare GCE, (B) MWCNT-GCE, (C) MWCNT-TiO<sub>2</sub>NP-GCE at various scan rates: 0.1, 0.2, 0.3, 0.4, 0.5, 0.6, 0.7, 0.8 and 0.9  $\text{V}\cdot\text{s}^{-1}$ .
